# Supplementary material
Source: JCI journal article supplement (doi:10.1172/jci.insight.201712)

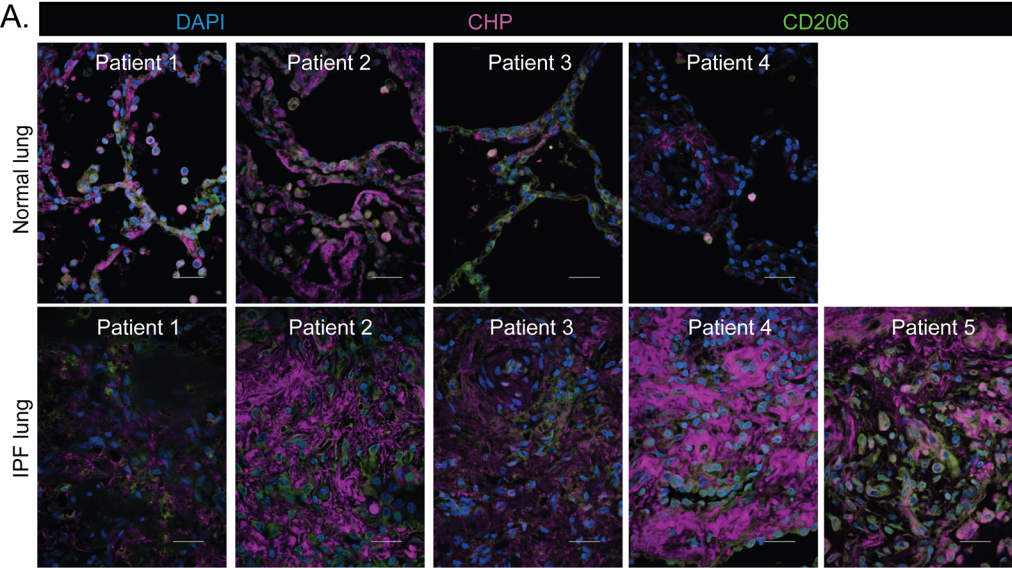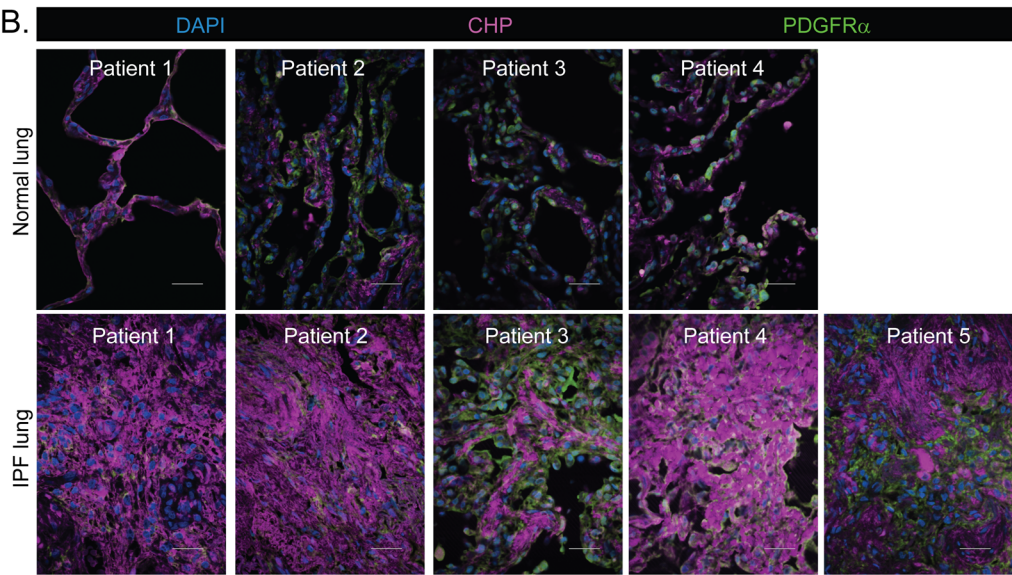

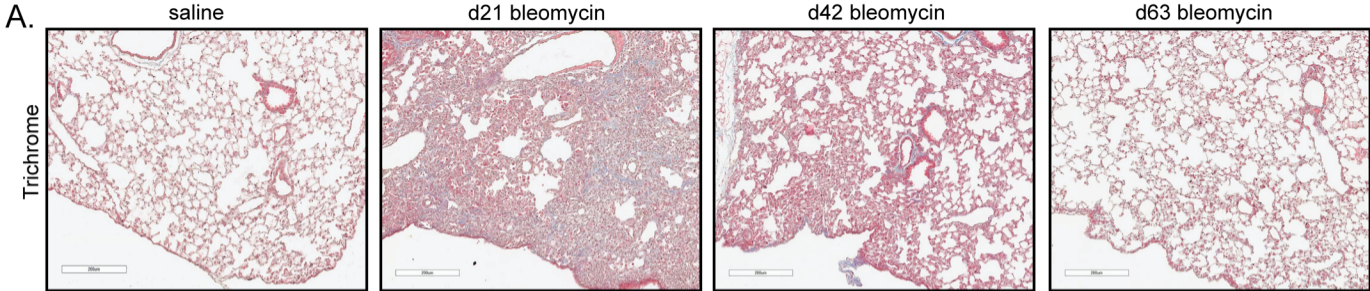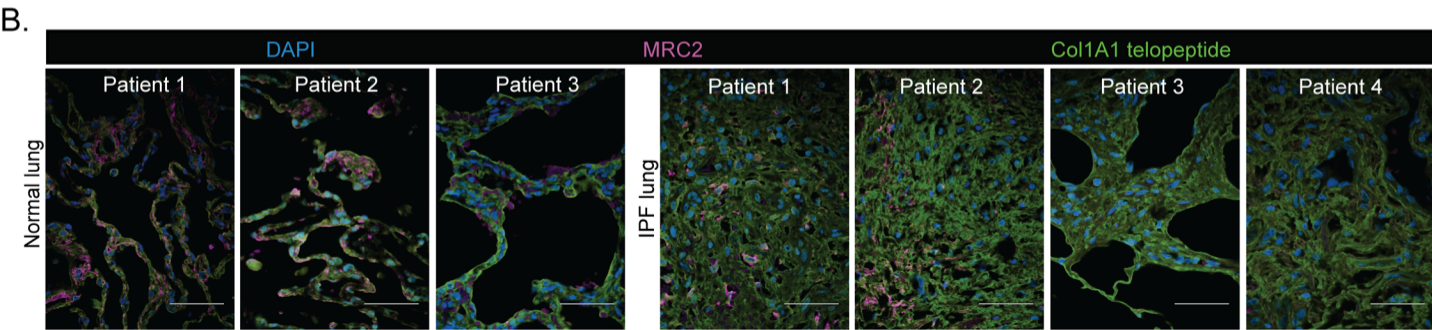

**A.**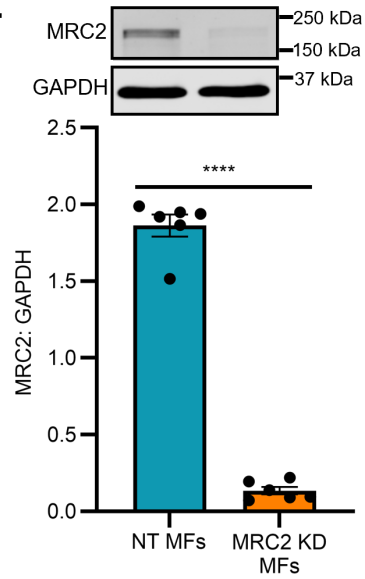**B.**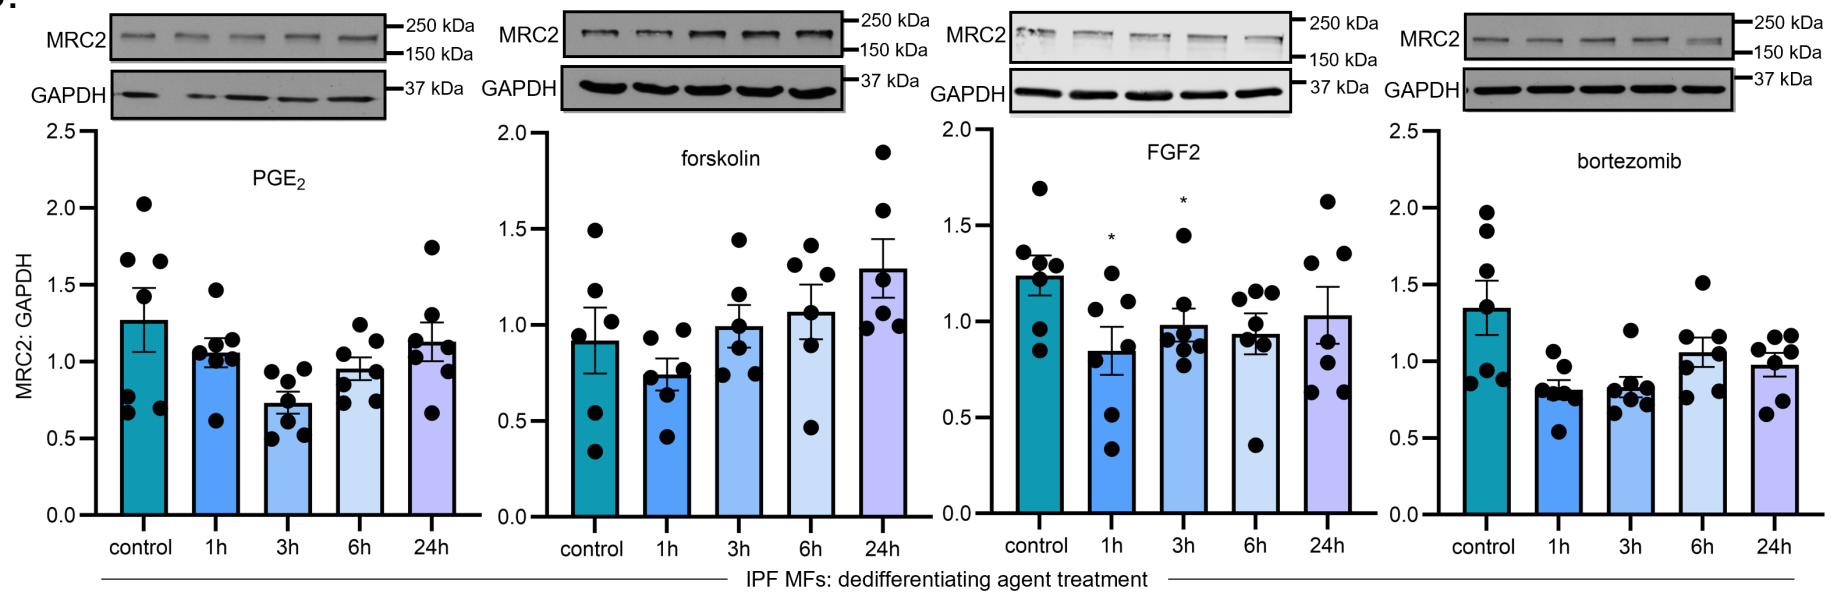**C.**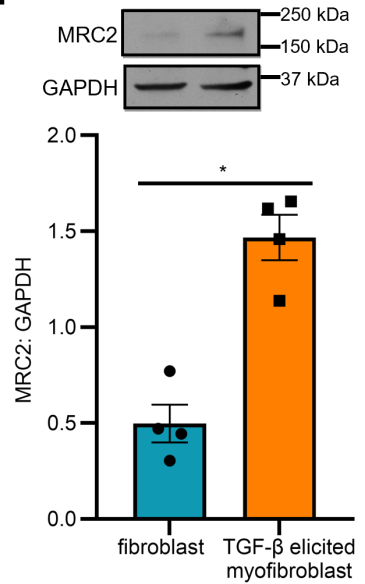**D.**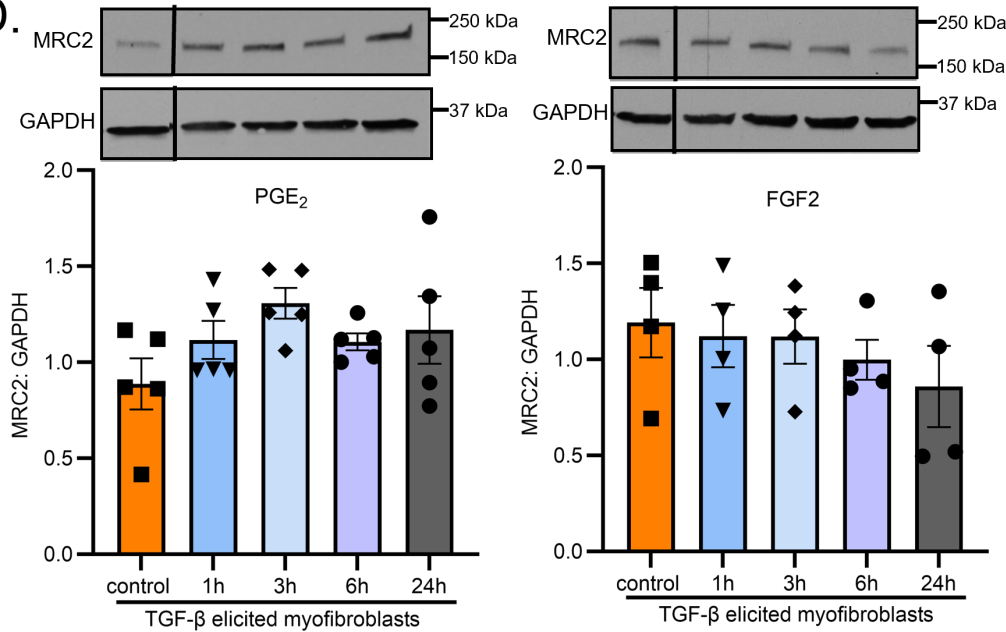

Supplement: sd2 [file 2]
